# Supplementary material for: Effects of MeJA on Arabidopsis metabolome under endogenous JA deficiency
Source: PubMed Central journal article supplement (PMC5121592; doi:10.1038/srep37674), 2016-11-24
Supplement: srep37674-s1.pdf [file srep37674-s1.pdf]

Effects of MeJA on *Arabidopsis* metabolome under endogenous JA deficiency

Jingjing Cao, Mengya Li, Jian Chen, Pei Liu, Zhen Li

## Supplementary Information

**Table S1 Detailed information of extraction optimization**

| Extract | Solvent        | Ratio (sample / solvent) | Condition  | Concentration        |
|---------|----------------|--------------------------|------------|----------------------|
| A       | Water, Organic | 1:3                      | Sonication | None                 |
| B       | Water, Organic | 1:15                     | Sonication | None                 |
| C       | Water, Organic | 1:15                     | Sonication | Vacuum concentration |
| D       | Water, Organic | 1:15                     | Heating    | Vacuum concentration |

**Table S2 List of identified compounds**

| Name (level of identification)                        | Compound ID | RT (min) | m/z      | Formula   | m/z (Theor) | Mass error (ppm) | WT/ <i>opr3</i> fold change ( <i>p</i> value) | <i>opr3_JA_1h/opr3</i> fold change ( <i>p</i> value) | <i>opr3_JA_4h/opr3</i> fold change ( <i>p</i> value) | <i>opr3_JA_8h/opr3</i> fold change ( <i>p</i> value) |
|-------------------------------------------------------|-------------|----------|----------|-----------|-------------|------------------|-----------------------------------------------|------------------------------------------------------|------------------------------------------------------|------------------------------------------------------|
| 1 Tetrahydrothiophene 1-oxide (II)                    | CSID1096    | 4.48     | 105.0371 | C4H8OS    | 105.0369    | 2.26             | 0.15 (2.33E-11)                               | 0.96 (3.46E-01)                                      | 0.32 (4.56E-15)                                      | 0.48 (1.96E-08)                                      |
| 2 4-Isothiocyanato-1-butene (II)                      | HMDB33867   | 5.47     | 114.0375 | C5H7NS    | 114.0372    | 2.66             | 2.93 (3.79E-18)                               | 1.15 (4.48E-03)                                      | 0.63 (5.04E-09)                                      | 0.92 (2.44E-01)                                      |
| 3 Proline (II)                                        | HMDB00162   | 0.90     | 116.0710 | C5H9NO2   | 116.0706    | 3.40             | 0.73 (2.67E-09)                               | 1.15 (3.72E-03)                                      | 1.34 (2.24E-07)                                      | 0.46 (2.37E-15)                                      |
| 4 6-Acetyl-1,2,3,4-tetrahydropyridine (II)            | HMDB30345   | 0.93     | 126.0916 | C7H11NO   | 126.0913    | 2.06             | 0.40 (8.05E-10)                               | 0.74 (3.43E-06)                                      | 0.83 (8.02E-03)                                      | 0.48 (1.32E-09)                                      |
| 5 (2E,4E)-2,4-Octadien-1-ol (II)                      | HMDB40151   | 5.40     | 127.1119 | C8H14O    | 127.1117    | 1.25             | 0.75 (2.98E-03)                               | 0.46 (4.60E-06)                                      | 0.80 (7.98E-03)                                      | 0.87 (6.48E-02)                                      |
| 6 5-Isothiocyanato-1-pentene (II)                     | HMDB34300   | 6.51     | 128.0530 | C6H9NS    | 128.0528    | 1.20             | 3.25 (4.24E-15)                               | 0.85 (2.03E-04)                                      | 0.52 (6.53E-14)                                      | 0.73 (3.42E-05)                                      |
| 7 p-Mentha-1,3,5,8-tetraene (II)                      | HMDB29641   | 8.02     | 133.1012 | C10H12    | 133.1012    | 0.17             | 1.48 (1.78E-12)                               | 2.73 (3.85E-08)                                      | 3.34 (2.48E-10)                                      | 3.09 (1.89E-11)                                      |
| 8 L-Glutamine (II)                                    | HMDB00641   | 1.08     | 147.0764 | C5H10N2O3 | 147.0764    | 0.13             | 0.47 (2.14E-08)                               | 1.05 (2.05E-01)                                      | 0.75 (9.41E-06)                                      | 0.80 (2.71E-05)                                      |
| 9 5-Hydroxy-p-mentha-6,8-dien-2-one (II)              | HMDB37011   | 11.06    | 149.0961 | C10H14O2  | 149.0961    | 0.06             | 0.89 (2.51E-04)                               | 0.88 (2.68E-03)                                      | 0.42 (3.01E-16)                                      | 0.31 (2.21E-18)                                      |
| 10 1-Methoxy-4-propylbenzene (II)                     | HMDB32626   | 8.06     | 151.1118 | C10H14O   | 151.1117    | 0.39             | 1.40 (2.23E-10)                               | 9.51 (3.07E-09)                                      | 11.52 (1.02E-10)                                     | 8.69 (1.84E-12)                                      |
| 11 2-Hydroxyadenine (II)                              | HMDB00403   | 4.84     | 152.0567 | C5H5N5O   | 152.0567    | 0.09             | 0.42 (9.21E-11)                               | 0.92 (1.00E-01)                                      | 0.54 (4.14E-12)                                      | 0.99 (8.66E-01)                                      |
| 12 3-Indoleacetonitrile (II)                          | HMDB06524   | 7.90     | 157.0760 | C10H8N2   | 157.0760    | 0.16             | 0.38 (1.06E-12)                               | 0.54 (7.17E-09)                                      | 2.78 (4.80E-07)                                      | 4.42 (8.38E-06)                                      |
| 13 Tranexamic Acid (II)                               | HMDB14447   | 0.92     | 158.1175 | C8H15NO2  | 158.1176    | 0.35             | 0.38 (5.84E-10)                               | 0.59 (7.11E-10)                                      | 0.78 (3.70E-04)                                      | 0.46 (5.37E-12)                                      |
| 14 Indoleacetaldehyde (II)                            | HMDB01190   | 6.15     | 160.0758 | C10H9NO   | 160.0757    | 0.68             | 0.50 (1.07E-09)                               | 0.74 (2.99E-06)                                      | 0.77 (2.75E-04)                                      | 0.68 (2.22E-07)                                      |
| 15 D-1,5-Anhydrofructose (II)                         | HMDB41561   | 0.89     | 163.0601 | C6H10O5   | 163.0601    | 0.00             | 0.20 (7.58E-08)                               | 0.63 (2.36E-06)                                      | 0.41 (2.84E-09)                                      | 0.32 (1.07E-10)                                      |
| 16 3-Methylsulfinylpropyl isothiocyanate (II)         | HMDB06095   | 4.48     | 164.0197 | C5H9NOS2  | 164.0198    | 0.80             | 0.09 (9.13E-12)                               | 0.77 (2.85E-06)                                      | 0.23 (6.59E-17)                                      | 0.31 (4.48E-13)                                      |
| 17 (1beta,2beta,5beta)-p-Menth-3-ene-1,2,5-triol (II) | HMDB38978   | 11.06    | 169.1222 | C10H18O3  | 169.1223    | 0.63             | 1.03 (2.35E-01)                               | 0.91 (1.35E-02)                                      | 0.41 (1.12E-15)                                      | 0.30 (9.93E-18)                                      |
| 18 (E)-10-Hydroxy-8-decenoic acid (II)                | HMDB39533   | 5.51     | 169.1223 | C10H18O3  | 169.1223    | 0.04             | 1.34 (1.30E-11)                               | 0.78 (6.13E-05)                                      | 1.68 (1.52E-08)                                      | 1.78 (2.24E-11)                                      |
| 19 2,4-Dimethylpimelic acid (II)                      | HMDB59760   | 11.06    | 171.1015 | C9H16O4   | 171.1016    | 0.41             | 1.13 (3.89E-04)                               | 0.96 (2.48E-01)                                      | 0.46 (7.92E-14)                                      | 0.35 (2.75E-16)                                      |
| 20 5-Hydroxyindoleacetaldehyde (II)                   | HMDB04073   | 6.77     | 176.0707 | C10H9NO2  | 176.0706    | 0.54             | 0.45 (8.10E-08)                               | 0.63 (1.99E-07)                                      | 0.82 (2.48E-04)                                      | 0.88 (1.30E-02)                                      |
| 21 2,5-Diisopropylphenol (II)                         | HMDB32579   | 11.33    | 179.1430 | C12H18O   | 179.1430    | 0.23             | 6.63 (1.91E-16)                               | 1.46 (1.71E-04)                                      | 5.08 (6.66E-10)                                      | 7.44 (2.22E-08)                                      |
| 22 6-(3-Hexenyl)tetrahydro-2H-pyran-2-one (II)        | HMDB37829   | 6.11     | 183.1375 | C11H18O2  | 183.1380    | 2.49             | 1.60 (1.23E-01)                               | 1.45 (4.52E-02)                                      | 3.14 (4.65E-04)                                      | 1.42 (1.66E-01)                                      |
| 23 Glycyl-Isoleucine (II)                             | HMDB28844   | 2.89     | 189.1236 | C8H16N2O3 | 189.1234    | 1.22             | 0.40 (2.86E-13)                               | 0.82 (6.34E-04)                                      | 0.84 (4.35E-04)                                      | 1.00 (9.17E-01)                                      |
| 24 1-Isothiocyanato-5-(methylsulfinyl)pentane (II)    | CSID178518  | 6.52     | 192.0511 | C7H13NOS2 | 192.0511    | 0.17             | 2.24 (1.45E-20)                               | 0.76 (4.04E-08)                                      | 0.45 (2.65E-16)                                      | 0.58 (1.52E-08)                                      |
| 25 Carbendazim (II)                                   | HMDB31769   | 3.54     | 192.0775 | C9H9N3O2  | 192.0768    | 3.89             | 0.38 (2.02E-12)                               | 1.01 (8.19E-01)                                      | 1.10 (2.44E-02)                                      | 0.88 (1.59E-02)                                      |

|    |                                                                          |             |       |          |            |          |      |                 |                   |                   |                   |
|----|--------------------------------------------------------------------------|-------------|-------|----------|------------|----------|------|-----------------|-------------------|-------------------|-------------------|
| 26 | Cucurbitic acid (II)                                                     | HMDB29388   | 8.03  | 195.1375 | C12H20O3   | 195.1380 | 2.52 | 0.49 (3.32E-14) | 0.92 (6.51E-02)   | 0.43 (6.08E-14)   | 0.61 (5.67E-12)   |
| 27 | Alanyl-Isoleucine (II)                                                   | HMDB28690   | 2.85  | 203.1391 | C9H18N2O3  | 203.1390 | 0.40 | 0.30 (9.10E-15) | 0.91 (4.79E-02)   | 0.82 (1.03E-04)   | 0.98 (7.19E-01)   |
| 28 | 4-Hydroxy-3-(3-methyl-2-butenyl) acetophenone (II)                       | HMDB30770   | 6.37  | 205.1220 | C13H16O2   | 205.1223 | 1.49 | 1.10 (1.52E-03) | 14.67 (9.30E-10)  | 10.97 (5.05E-09)  | 9.65 (8.53E-10)   |
| 29 | Dhelwangin (II)                                                          | HMDB30703   | 7.18  | 207.1015 | C12H16O4   | 207.1016 | 0.34 | 1.17 (7.67E-06) | 2.13 (1.07E-07)   | 2.02 (1.06E-10)   | 1.89 (4.16E-13)   |
| 30 | 10beta-12,13-Dinor-8-oxo-6-eremophilene-11-al (II)                       | HMDB37604   | 9.57  | 207.1379 | C13H18O2   | 207.1380 | 0.27 | 0.38 (1.46E-09) | 0.71 (3.68E-08)   | 0.73 (6.71E-08)   | 0.76 (8.83E-07)   |
| 31 | 3,4-Methylenesuccinic acid (II)                                          | HMDB59729   | 4.80  | 209.1174 | C12H18O4   | 209.1172 | 0.86 | 3.42 (1.60E-13) | 28.01 (1.16E-10)  | 305.66 (1.75E-11) | 551.57 (2.28E-13) |
| 32 | 4,5-Dihydrovomifoliol (II)                                               | HMDB40615   | 11.06 | 209.1535 | C13H22O3   | 209.1536 | 0.51 | 1.00 (9.32E-01) | 0.93 (7.38E-02)   | 0.38 (1.40E-16)   | 0.27 (7.85E-19)   |
| 33 | Hydroxyphenylacetylglycine (II)                                          | HMDB00735   | 1.92  | 210.0762 | C10H11NO4  | 210.0761 | 0.55 | 0.45 (1.52E-07) | 0.78 (3.18E-04)   | 0.86 (1.28E-02)   | 1.10 (4.11E-02)   |
| 34 | Jasmonic acid (II)                                                       | HMDB32797   | 8.06  | 211.1327 | C12H18O3   | 211.1329 | 0.81 | 1.20 (2.50E-04) | 118.12 (1.13E-09) | 133.93 (4.29E-17) | 89.05 (1.36E-12)  |
| 35 | 2-Hydroxyacorenone (II)                                                  | HMDB30916   | 9.88  | 219.1741 | C15H24O2   | 219.1743 | 1.10 | 2.46 (3.87E-15) | 0.90 (3.08E-02)   | 2.33 (4.50E-07)   | 3.19 (3.37E-17)   |
| 36 | Calamusenone (II)                                                        | HMDB38200   | 9.63  | 219.1743 | C15H22O    | 219.1743 | 0.19 | 2.52 (1.19E-15) | 0.88 (1.40E-02)   | 2.28 (1.44E-06)   | 3.06 (3.24E-16)   |
| 37 | Glycyl-Phenylalanine (II)                                                | HMDB28848   | 3.40  | 223.1077 | C11H14N2O3 | 223.1077 | 0.08 | 0.33 (3.93E-10) | 0.87 (8.01E-03)   | 0.82 (3.19E-04)   | 1.01 (7.36E-01)   |
| 38 | (8alpha,10beta,11beta)-3-Hydroxy-4,15-dinor-1(5)-xanthen-12,8-olide (II) | HMDB37244   | 9.53  | 225.1482 | C13H20O3   | 225.1485 | 1.43 | 3.96 (2.34E-09) | 1.14 (2.78E-03)   | 2.58 (3.64E-07)   | 2.43 (6.67E-07)   |
| 39 | Procurcumadiol (II)                                                      | HMDB34721   | 8.04  | 233.1534 | C15H22O3   | 233.1536 | 0.89 | 2.88 (5.81E-21) | 1.13 (2.47E-02)   | 2.34 (2.74E-14)   | 2.97 (2.62E-14)   |
| 40 | Zedoaradiol (II)                                                         | HMDB36448   | 8.69  | 235.1692 | C15H24O3   | 235.1693 | 0.24 | 1.82 (4.83E-16) | 1.02 (6.12E-01)   | 1.59 (6.97E-09)   | 2.09 (2.11E-11)   |
| 41 | Serinyl-Methionine (II)                                                  | HMDB29045   | 1.39  | 237.0904 | C8H16N2O4S | 237.0904 | 0.19 | 0.40 (2.03E-13) | 0.80 (8.33E-05)   | 0.72 (8.03E-07)   | 0.85 (7.63E-05)   |
| 42 | L-Pyridosine (II)                                                        | HMDB29443   | 3.50  | 237.1233 | C12H18N2O4 | 237.1234 | 0.29 | 0.25 (1.68E-10) | 1.01 (8.69E-01)   | 0.79 (1.37E-04)   | 1.04 (5.35E-01)   |
| 43 | 1,2,3,4-Tetramethoxy-5-(2-propenyl)benzene (II)                          | HMDB34046   | 6.53  | 239.1275 | C13H18O4   | 239.1278 | 1.19 | 1.02 (5.57E-01) | 14.61 (6.36E-10)  | 12.18 (1.46E-12)  | 8.24 (4.42E-11)   |
| 44 | (2S)-2-(4-Nitrophenyl)succinic acid (II)                                 | CSID643369  | 2.17  | 240.0499 | C10H9NO6   | 240.0503 | 1.51 | 0.40 (2.59E-08) | 0.96 (3.84E-01)   | 0.80 (1.01E-04)   | 1.08 (8.48E-02)   |
| 45 | Demethoxyshogaol (II)                                                    | HMDB41250   | 9.63  | 247.1691 | C16H22O2   | 247.1693 | 0.63 | 2.39 (3.26E-11) | 0.99 (8.15E-01)   | 2.25 (2.00E-07)   | 2.40 (9.91E-09)   |
| 46 | Ginsenosyne J (II)                                                       | HMDB40373   | 11.09 | 247.2057 | C17H26O    | 247.2056 | 0.23 | 3.30 (2.03E-20) | 1.08 (1.27E-01)   | 1.87 (4.16E-08)   | 1.90 (3.03E-10)   |
| 47 | 1-Isothiocyano-9-(methylsulfinyl) nonane (II)                            | CSID8096856 | 9.90  | 248.1134 | C11H21NOS2 | 248.1137 | 1.34 | 0.24 (5.60E-18) | 0.79 (4.67E-06)   | 0.72 (4.01E-09)   | 0.75 (7.85E-08)   |
| 48 | 5-Hydroxyindoleacetylglycine (II)                                        | HMDB04185   | 3.76  | 249.0864 | C12H12N2O4 | 249.0870 | 2.34 | 0.29 (2.14E-14) | 0.82 (4.09E-04)   | 0.76 (7.15E-06)   | 0.99 (8.84E-01)   |
| 49 | Helianuol C (II)                                                         | HMDB35131   | 8.63  | 249.1486 | C15H20O3   | 249.1485 | 0.32 | 2.01 (1.09E-16) | 0.90 (2.38E-02)   | 1.59 (1.44E-05)   | 2.01 (5.72E-09)   |
| 50 | Dimethylbenzyl carbonyl hexanoate (II)                                   | HMDB32228   | 10.23 | 249.1848 | C16H24O2   | 249.1849 | 0.43 | 4.53 (5.71E-14) | 1.02 (6.27E-01)   | 1.93 (1.03E-05)   | 1.91 (3.21E-10)   |
| 51 | FS4 toxin (II)                                                           | HMDB37064   | 7.48  | 251.1638 | C15H22O3   | 251.1642 | 1.48 | 3.09 (5.87E-20) | 1.18 (1.77E-03)   | 2.41 (1.04E-11)   | 2.98 (4.19E-09)   |
| 52 | 3-Methyl-alpha-ionyl acetate (II)                                        | HMDB37631   | 11.72 | 251.2005 | C16H26O2   | 251.2006 | 0.23 | 1.06 (1.53E-01) | 1.04 (3.53E-01)   | 0.76 (5.39E-08)   | 0.72 (2.65E-09)   |

|    |                                                                |            |       |          |             |          |      |                  |                   |                   |                  |
|----|----------------------------------------------------------------|------------|-------|----------|-------------|----------|------|------------------|-------------------|-------------------|------------------|
| 53 | Seriny-Phenylalanine (II)                                      | HMDB29046  | 3.26  | 253.1183 | C12H16N2O4  | 253.1183 | 0.07 | 0.62 (1.34E-06)  | 1.01 (8.93E-01)   | 0.97 (6.01E-01)   | 1.12 (4.02E-02)  |
| 54 | Methyl-3-(2,3-dihydroxy-3-methylbutyl)-4-hydroxybenzoate (II)  | HMDB32796  | 5.74  | 255.1226 | C13H18O5    | 255.1227 | 0.39 | 1.87 (5.00E-06)  | 175.08 (1.34E-09) | 174.30 (6.67E-11) | 169.41(1.10E-12) |
| 55 | 1-(beta-D-Ribofuranosyl)-3- pyridiniumcarboxylate (II)         | CSID141635 | 0.92  | 256.0815 | C11H13NO6   | 256.0816 | 0.25 | 0.37 (5.75E-16)  | 0.91 (4.65E-03)   | 0.71 (1.75E-11)   | 0.71 (3.98E-11)  |
| 56 | Nandrolone (II)                                                | HMDB02725  | 10.14 | 257.1898 | C18H26O2    | 257.1900 | 0.75 | 1.97 (3.36E-18)  | 0.97 (4.93E-01)   | 1.72 (3.78E-13)   | 2.08 (3.88E-13)  |
| 57 | 1-[(2,5-Dimethylphenyl)azo]-2-naphthalenol (II)                | HMDB32889  | 8.71  | 259.1229 | C18H16N2O   | 259.1230 | 0.29 | 0.23 (1.68E-07)  | 0.95 (5.44E-01)   | 0.50 (7.32E-06)   | 1.58 (4.03E-03)  |
| 58 | Methionyl-Isoleucine (II)                                      | HMDB28976  | 1.23  | 263.1423 | C11H22N2O3S | 263.1424 | 0.34 | 0.18 (1.25E-07)  | 0.66 (7.08E-05)   | 1.58 (2.37E-07)   | 1.53 (4.00E-07)  |
| 59 | Phenylalanyl-Valine (II)                                       | HMDB29008  | 3.82  | 265.1548 | C14H20N2O3  | 265.1547 | 0.49 | 0.49 (8.38E-09)  | 0.89 (1.20E-01)   | 0.91 (9.23E-02)   | 1.09 (1.13E-01)  |
| 60 | 12-Oxo-2,3-dinor-10,15-phytodienoic acid (II)                  | HMDB32090  | 9.90  | 265.1797 | C16H24O3    | 265.1798 | 0.46 | 4.55 (5.04E-12)  | 1.19 (6.94E-03)   | 4.56 (1.00E-07)   | 6.61 (7.97E-12)  |
| 61 | 4-Hydroxy-3-methoxy-2,10-bisaboladien-9-one (II)               | HMDB33917  | 10.02 | 267.1952 | C16H26O3    | 267.1955 | 1.01 | 4.63 (2.55E-11)  | 1.19 (4.60E-03)   | 4.00 (8.79E-08)   | 5.53 (3.32E-09)  |
| 62 | Estradiol (II)                                                 | HMDB00151  | 9.03  | 273.1847 | C18H24O2    | 273.1849 | 0.90 | 2.66 (2.60E-13)  | 0.95 (1.87E-01)   | 2.24 (2.34E-09)   | 2.71 (1.95E-09)  |
| 63 | BR-Xanthone B (II)                                             | HMDB33326  | 5.31  | 275.0549 | C14H10O6    | 275.0550 | 0.42 | 1.65 (4.27E-13)  | 1.03 (5.54E-01)   | 1.30 (8.14E-06)   | 1.69 (1.73E-12)  |
| 64 | 19-Nor-5-androstenediol (II)                                   | HMDB04590  | 10.97 | 277.2159 | C18H28O2    | 277.2162 | 1.11 | 2.52 (1.58E-15)  | 1.00 (9.73E-01)   | 1.45 (1.78E-05)   | 1.49 (3.01E-07)  |
| 65 | Alpha-linolenic acid (II)                                      | HMDB01388  | 11.20 | 279.2316 | C18H30O2    | 279.2319 | 0.92 | 3.55 (8.59E-21)  | 1.10 (7.14E-02)   | 1.97 (3.39E-06)   | 2.01 (3.01E-10)  |
| 66 | Artemether (II)                                                | HMDB15643  | 7.42  | 281.1743 | C16H26O5    | 281.1747 | 1.55 | 2.64 (7.75E-20)  | 1.03 (6.00E-01)   | 3.07 (1.23E-08)   | 3.75 (3.98E-11)  |
| 67 | Lactapiperanol C (II)                                          | HMDB33630  | 9.23  | 283.1901 | C16H26O4    | 283.1904 | 1.01 | 2.14 (6.20E-14)  | 0.89 (5.31E-02)   | 2.06 (7.56E-07)   | 2.26 (1.24E-09)  |
| 68 | Tetraphyllin B (II)                                            | HMDB29914  | 6.91  | 288.1083 | C12H17NO7   | 288.1078 | 1.81 | 5.82 (1.40E-12)  | 1.19 (3.19E-03)   | 2.82 (4.15E-06)   | 3.96 (1.38E-09)  |
| 69 | Estriol (II)                                                   | HMDB00153  | 9.85  | 289.1794 | C18H24O3    | 289.1798 | 1.46 | 3.45 (2.65E-11)  | 1.10 (7.55E-02)   | 1.80 (1.85E-05)   | 2.31 (4.23E-08)  |
| 70 | (9Z,11E,13E,15Z)-4-Oxo-9,11,13,15-octadecatetraenoic acid (II) | HMDB31098  | 9.02  | 291.1951 | C18H26O3    | 291.1955 | 1.27 | 2.89 (6.43E-16)  | 1.01 (8.26E-01)   | 2.48 (5.99E-10)   | 2.91 (6.47E-10)  |
| 71 | (2'E,4'Z,7'Z,8E)-Colnelenic acid (II)                          | HMDB30996  | 10.66 | 293.2105 | C18H28O3    | 293.2111 | 2.12 | 4.23 (6.53E-18)  | 1.12 (1.73E-02)   | 3.37 (1.37E-08)   | 4.17 (9.28E-13)  |
| 72 | Tyrosyl-Isoleucine (II)                                        | HMDB29108  | 3.74  | 295.1653 | C15H22N2O4  | 295.1652 | 0.22 | 0.49 (1.46E-09)  | 0.84 (3.11E-02)   | 0.83 (2.78E-03)   | 1.01 (7.99E-01)  |
| 73 | 13(S)-HOT (II)                                                 |            | 10.20 | 295.2267 | C18H30O3    | 295.2268 | 0.24 | 2.48 (3.97E-10)  | 0.99 (8.31E-01)   | 2.19 (7.26E-08)   | 2.45 (1.88E-08)  |
| 74 | 15-KETE (II)                                                   | HMDB10210  | 12.02 | 301.2158 | C20H30O3    | 301.2162 | 1.35 | 2.06 (9.62E-14)  | 1.04 (3.66E-01)   | 2.15 (3.15E-10)   | 2.59 (2.37E-08)  |
| 75 | Ascorbigen (II)                                                | HMDB29839  | 5.24  | 306.0968 | C15H15NO6   | 306.0972 | 1.35 | 12.05 (1.13E-11) | 0.49 (2.94E-10)   | 6.65 (2.06E-05)   | 6.33 (1.48E-04)  |
| 76 | 5'-Carboxy-gamma-chromanol (II)                                | HMDB12799  | 9.85  | 307.1898 | C18H26O4    | 307.1904 | 1.91 | 27.02 (1.12E-11) | 1.96 (1.55E-07)   | 17.09 (1.14E-06)  | 22.05 (9.88E-08) |
| 77 | Corchorifatty acid A (II)                                      | HMDB32664  | 9.72  | 309.2057 | C18H28O4    | 309.2060 | 1.09 | 4.50 (1.37E-18)  | 1.03 (4.45E-01)   | 3.17 (2.18E-09)   | 3.48 (1.60E-09)  |
| 78 | (9Z,11R,12S,13S,15Z)-12,13-Epoxy-11-hydroxy-                   | HMDB33505  | 10.03 | 311.2210 | C18H30O4    | 311.2217 | 2.20 | 1.12 (3.38E-04)  | 0.75 (6.07E-07)   | 0.95 (1.90E-01)   | 0.86 (7.14E-04)  |

|     |                                                         |           |       |          |             |          |      |                   |                  |                  |                  |
|-----|---------------------------------------------------------|-----------|-------|----------|-------------|----------|------|-------------------|------------------|------------------|------------------|
|     | 9,15-octadecadienoic acid (II)                          |           |       |          |             |          |      |                   |                  |                  |                  |
| 79  | Avocadene 1-acetate (II)                                | HMDB31043 | 11.20 | 311.2575 | C19H36O4    | 311.2581 | 1.84 | 3.81 (2.28E-21)   | 0.87 (2.30E-02)  | 3.73 (6.81E-02)  | 4.16 (2.18E-16)  |
| 80  | (±)-(E)-13-Hydroxy-10-oxo-11-octadecenoic acid (II)     | HMDB40900 | 10.69 | 313.2368 | C18H32O4    | 313.2373 | 1.71 | 1.68 (2.29E-10)   | 1.09 (7.51E-02)  | 1.31 (8.29E-03)  | 0.97 (5.93E-01)  |
| 81  | Dehydrophytosphingosine (II)                            | HMDB38057 | 10.40 | 316.2842 | C18H37NO3   | 316.2846 | 1.33 | 0.49 (5.90E-09)   | 0.68 (2.92E-06)  | 0.58 (9.49E-07)  | 0.58 (2.04E-06)  |
| 82  | Phytocassane D (II)                                     | HMDB41057 | 10.14 | 317.2105 | C20H28O3    | 317.2111 | 1.96 | 1.86 (5.31E-16)   | 0.94 (1.63E-01)  | 1.74 (1.56E-13)  | 1.92 (3.27E-12)  |
| 83  | Oryzalide B (II)                                        | HMDB37592 | 7.99  | 321.2054 | C19H28O4    | 321.2060 | 1.98 | 10.75 (4.12E-14)  | 1.67 (3.74E-07)  | 10.65 (2.23E-12) | 13.82 (1.20E-11) |
| 84  | 14,15-DiHETrE (II)                                      | HMDB02265 | 11.33 | 321.2421 | C20H34O4    | 321.2424 | 1.00 | 1.03 (5.46E-01)   | 1.10 (1.06E-01)  | 0.80 (3.17E-02)  | 0.60 (1.40E-05)  |
| 85  | Alpha-Linolenoyl ethanolamide (II)                      | HMDB13624 | 11.50 | 322.2736 | C20H35NO2   | 322.2741 | 1.41 | 0.46 (1.14E-06)   | 0.91 (1.48E-01)  | 0.60 (1.76E-06)  | 0.60 (1.94E-06)  |
| 86  | 2,3-Dinor-8-iso prostaglandin F2alpha (II)              |           | 8.81  | 327.2162 | C18H30O5    | 327.2166 | 1.22 | 3.19 (8.82E-21)   | 1.10 (1.25E-01)  | 2.89 (1.27E-09)  | 3.28 (1.02E-11)  |
| 87  | Tryptophyl-Phenylalanine (II)                           | HMDB29090 | 6.60  | 334.1548 | C20H21N3O3  | 334.1550 | 0.61 | 0.39 (2.48E-11)   | 0.83 (1.28E-03)  | 0.48 (1.62E-10)  | 0.75 (1.46E-04)  |
| 88  | 9,10-DiHODE (II)                                        | HMDB10221 | 10.77 | 335.2186 | C18H32O4    | 335.2193 | 2.03 | 1.67 (2.89E-10)   | 0.74 (7.77E-07)  | 1.79 (2.08E-09)  | 1.76 (4.54E-09)  |
| 89  | Cibacic acid (II)                                       | HMDB38580 | 9.52  | 347.1825 | C18H28O5    | 347.1829 | 1.14 | 1.81 (2.19E-11)   | 0.70 (5.95E-06)  | 1.61 (2.24E-06)  | 1.62 (2.34E-09)  |
| 90  | Tetrahydrocortisol (II)                                 | HMDB00949 | 8.54  | 349.2368 | C21H34O5    | 349.2373 | 1.53 | 7.51 (1.43E-09)   | 2.25 (1.33E-07)  | 13.90 (5.80E-10) | 26.49 (2.53E-10) |
| 91  | 2,3-Dinor-8-iso prostaglandin F1alpha (II)              |           | 8.03  | 351.2134 | C18H32O5    | 351.2142 | 2.26 | 0.23 (3.11E-13)   | 0.75 (4.47E-07)  | 0.24 (1.14E-18)  | 0.25 (8.73E-14)  |
| 92  | Phe Pro Thr (II)                                        |           | 3.93  | 364.1865 | C18H25N3O5  | 364.1867 | 0.54 | 0.49 (5.28E-13)   | 0.58 (8.94E-10)  | 0.65 (4.87E-10)  | 0.74 (2.71E-06)  |
| 93  | D-1-[(3-Carboxypropyl)amino]-1-deoxyfructose (II)       | HMDB38663 | 7.93  | 266.1235 | C10H19NO7   | 266.1234 | 0.12 | 234.68 (6.00E-08) | 62.81 (1.51E-02) | 70.73 (1.50E-06) | 58.41 (4.60E-04) |
| 94  | Cortolone (II)                                          | HMDB03128 | 9.15  | 367.2466 | C21H34O5    | 367.2479 | 3.54 | 3.72 (1.41E-11)   | 1.85 (4.90E-07)  | 5.08 (1.99E-07)  | 5.69 (3.83E-09)  |
| 95  | Asp Lys Ile (II)                                        |           | 1.58  | 375.2234 | C16H30N4O6  | 375.2238 | 1.10 | 1.24 (7.64E-06)   | 0.44 (2.18E-10)  | 0.97 (5.31E-01)  | 1.01 (9.12E-01)  |
| 96  | Sarcostin (II)                                          |           | 8.19  | 383.2425 | C21H34O6    | 383.2428 | 0.82 | 6.41 (8.82E-22)   | 1.45 (1.06E-04)  | 6.05 (1.74E-07)  | 8.12 (1.34E-08)  |
| 97  | Prostaglandin E2 ethanolamide (II)                      | HMDB13038 | 7.52  | 396.2730 | C22H37NO5   | 396.2744 | 3.66 | 4.40 (1.77E-05)   | 0.92 (7.42E-01)  | 3.20 (1.00E-04)  | 5.58 (1.93E-04)  |
| 98  | PG(16:1(9Z)/0:0) (II)                                   |           | 11.13 | 465.2602 | C22H43O9P   | 465.2612 | 2.11 | 5.66 (8.22E-14)   | 0.93 (2.99E-01)  | 4.34 (5.66E-10)  | 5.17 (3.50E-10)  |
| 99  | 1-Isothiocyanato-8-(methylsulfinyl)octane (II)          |           | 9.35  | 467.1884 | C10H19ONS2  | 467.1889 | 1.04 | 0.38 (1.54E-09)   | 0.71 (3.80E-08)  | 0.73 (6.89E-08)  | 0.76 (7.86E-07)  |
| 100 | Blumenol C O-[rhamnosyl-(1->6)-glucoside] (II)          | HMDB31935 | 7.79  | 541.2609 | C25H42O11   | 541.2619 | 1.91 | 2.68 (4.10E-16)   | 1.16 (1.52E-02)  | 2.44 (2.30E-15)  | 2.13 (6.66E-11)  |
| 101 | 3-Hydroxy-beta-ionol-3-[glucosyl-(1->6)-glucoside] (II) | HMDB37527 | 6.14  | 557.2561 | C25H42O12   | 557.2568 | 1.34 | 3.18 (1.35E-13)   | 0.80 (5.60E-06)  | 2.08 (2.20E-08)  | 1.61 (1.91E-12)  |
| 102 | Leukotriene F4 (II)                                     | HMDB06465 | 9.12  | 569.2915 | C28H44N2O8S | 569.2891 | 4.19 | 1.85 (1.11E-10)   | 1.26 (8.03E-03)  | 2.58 (6.52E-08)  | 2.56 (6.82E-11)  |
| 103 | Melilotoside A (II)                                     | HMDB41464 | 11.32 | 613.4092 | C35H58O7    | 613.4075 | 2.81 | 26.42 (5.48E-10)  | 1.54 (8.43E-05)  | 23.39 (8.45E-08) | 46.81 (1.18E-08) |
| 104 | Sulforaphane (II)                                       | HMDB05792 | 5.45  | 178.0353 | C6H11NOS2   | 178.0355 | 1.25 | 1.90 (2.03E-18)   | 0.94 (7.68E-04)  | 0.43 (7.81E-16)  | 0.52 (2.26E-08)  |

|     |                                                   |           |      |          |             |          |      |                 |                 |                  |                   |
|-----|---------------------------------------------------|-----------|------|----------|-------------|----------|------|-----------------|-----------------|------------------|-------------------|
| 105 | 1-Isothiocyanato-6-(methylsulfinyl) hexane (II)   | HMDB38461 | 7.48 | 206.0668 | C8H15NOS2   | 206.0668 | 0.00 | 1.23 (8.55E-09) | 0.81 (1.47E-07) | 0.70 (5.64E-11)  | 0.78 (1.80E-07)   |
| 106 | 1-Isothiocyanato-7-(methylsulfinyl) heptanes (II) | HMDB38441 | 8.47 | 220.0824 | C9H17NOS2   | 220.0824 | 0.00 | 0.84 (1.63E-05) | 0.80 (1.45E-07) | 0.73 (1.69E-07)  | 0.71 (3.46E-10)   |
| 107 | Glucobrassicinapin (II)                           | HMDB38417 | 4.37 | 388.0735 | C12H21NO9S2 | 388.0730 | 1.16 | 4.04 (2.51E-03) | 1.25 (4.29E-01) | 47.90 (3.24E-11) | 152.12 (5.71E-11) |
| 108 | Indolylmethyl-desulfoglucosinolate (II)           |           | 4.27 | 369.1113 | C16H20N2O6S | 369.1115 | 0.50 | 0.56 (7.09E-05) | 1.29 (1.27E-03) | 6.04 (9.23E-18)  | 25.78 (4.37E-10)  |
| 109 | 8-Methylthiooctyl glucosinolate (II)              |           | 6.60 | 478.1230 | C16H31NO9S3 | 478.1234 | 0.77 | 0.00 (8.67E-06) | 0.59 (4.00E-03) | 0.15 (2.72E-05)  | 0.23 (5.50E-05)   |

Metabolite identifications can be classified as level II based upon their spectral similarities with public/commercial spectral libraries in accordance with the MSI guidelines

**Table S3 Result from Pathway Analysis**

|                                             | Total Cmpd | Hits | Raw p    | -log(p) | Holm adjust | FDR      | Impact |
|---------------------------------------------|------------|------|----------|---------|-------------|----------|--------|
| Arginine and proline metabolism             | 38         | 2    | 9.87E-18 | 39.157  | 9.87E-17    | 4.94E-17 | 0.09   |
| Aminoacyl-tRNA biosynthesis                 | 67         | 2    | 9.87E-18 | 39.157  | 9.87E-17    | 4.94E-17 | 0      |
| alpha-linolenic acid metabolism             | 23         | 2    | 6.97E-16 | 34.899  | 5.58E-15    | 2.32E-15 | 0.16   |
| Tryptophan metabolism                       | 27         | 4    | 1.72E-15 | 33.995  | 1.21E-14    | 4.31E-15 | 0.29   |
| Glucosinolate biosynthesis                  | 54         | 1    | 5.41E-13 | 28.244  | 3.25E-12    | 1.08E-12 | 0.04   |
| Biosynthesis of unsaturated fatty acids     | 42         | 1    | 7.84E-13 | 27.874  | 3.92E-12    | 1.31E-12 | 0      |
| Alanine, aspartate and glutamate metabolism | 22         | 1    | 1.33E-12 | 27.344  | 5.33E-12    | 1.33E-12 | 0.24   |
| Purine metabolism                           | 61         | 1    | 1.33E-12 | 27.344  | 5.33E-12    | 1.33E-12 | 0      |
| Pyrimidine metabolism                       | 38         | 1    | 1.33E-12 | 27.344  | 5.33E-12    | 1.33E-12 | 0      |
| Nitrogen metabolism                         | 15         | 1    | 1.33E-12 | 27.344  | 5.33E-12    | 1.33E-12 | 0      |

**Table S4 Primer sequences for gene expression analysis by RT-qPCR**

| Gene Symbol     | Accession No. | Description                                             | Forward and reverse primer Sequence (5'-3')            | Pathway                             |                       |
|-----------------|---------------|---------------------------------------------------------|--------------------------------------------------------|-------------------------------------|-----------------------|
| <i>BCAT4</i>    | AT3G19710     | Branched-chain aminotransferase 4                       | GCGAATGTCAAGTGGGAAGAG<br>TGGCCATACTGAAGAACAGCAG        | Glucosinolates metabolism           |                       |
| <i>MAM1</i>     | AT5G23010     | Methylthioalkylmalate synthase 1                        | GCATTGTTTCATCTCATGTTG<br>GCGGAGTGAGGGATCCACCA          |                                     |                       |
| <i>MAM3</i>     | AT5G23020     | Methylthioalkylmalate synthase-like                     | CTCTCTCGCCTGACCCGTTCA<br>ACACGCACATAGTTCTTGTGG         |                                     |                       |
| <i>CYP79F1</i>  | AT1G16410     | Cytochrome p450, family 79, subfamily f, polypeptide 1  | CATGGAATGGACACTTGCGGA<br>TGAATGTGGCTACCTTTGGGA         |                                     |                       |
| <i>TGG1</i>     | AT5G26000     | Myrosinase 1                                            | GCAGCCAGTTACTACTACCCAAA<br>TTATCCCCAAGAGACCAAGC        |                                     |                       |
| <i>TGG2</i>     | AT5G25980     | Myrosinase 2                                            | GCTTCACTCACCGATACCCA<br>ACTCCAAGCTCTTCCATCACG          |                                     |                       |
| <i>UGT74B1</i>  | AT1G24100     | UDP-glucosyl transferase 74b1                           | CACCACTACCTACACCGCCTCCTCA<br>GCTCAAAGACGGTAAGCCACGGATA |                                     |                       |
| <i>SOT16</i>    | AT1G74100     | Desulfo-glucosinolate sulfotransferase 16               | CATGGGTTATGGATTCATGAT<br>ATCTCAGGAGTCAAATAATTAGC       |                                     |                       |
| <i>CYP79B2</i>  | AT4G39950     | Cytochrome p450, family 79, subfamily b, polypeptide 2  | AAAGCTATCCTCCGCGAAGC<br>CATATCGGCTAAGAAGGACTTGAC       |                                     | Tryptophan metabolism |
| <i>CYP79B3</i>  | AT2G22330     | Cytochrome p450, family 79, subfamily b, polypeptide 3  | TCTACCGATGCTTACGGGATTG<br>TACAAGTTCCTTAATGGTTGGTTTG    |                                     |                       |
| <i>CYP71A13</i> | AT2G30770     | Cytochrome p450, family 71, subfamily a, polypeptide 13 | ATTCGGATCAGGGAGAAGGATA<br>CGATACCAATGGCTTCAGTTAGAT     |                                     |                       |
| <i>NIT1</i>     | AT3G44310     | Nitrilase 1                                             | AAGCAAGGGAGCAGAGCTAGTGTT<br>TTCCCTAGCCACGTCAGCCAATCT   |                                     |                       |
| <i>NIT2</i>     | AT3G44300     | Nitrilase 2                                             | CTCATCCACCATTGTTTCGAG<br>CTTGCAGCCTCCACAATAAA          |                                     |                       |
| <i>NIT3</i>     | AT3G44320     | Nitrilase 3                                             | ATGATCCTACTGTCTCCGGAGGTG<br>CCAAGATCAAGATCAGCTGTGACG   |                                     |                       |
| <i>AOS</i>      | AT5G42650     | Allene oxide synthase                                   | TGGTTATCGAAAGCCACGAC<br>AATCTCTCCGGCACAAACTC           |                                     |                       |
| <i>AOC1</i>     | AT3G25760     | Allene oxide cyclase 1                                  | CTCTCAGAACTTGGGAAATAC<br>GATCTCCGAGACCAAAACCTA         | $\alpha$ -linolenic acid metabolism |                       |
| <i>AOC2</i>     | AT3G25770     | Allene oxide cyclase 2                                  | AATTAGATCGACACAGCCCCAAG<br>CCGAGACCGAACATTAAGCTGA      |                                     |                       |
| <i>AOC3</i>     | AT3G25780     | Allene oxide cyclase 3                                  | CGAAGGAGATAGAAACAGTCCAGC<br>CCGAGACAAAGCTCTGTTGGTT     |                                     |                       |
| <i>AOC4</i>     | AT1G13280     | Allene oxide cyclase 4                                  | AACGCATAGGAATCACCGCA<br>TGTGACCATAATCTCCGAAGTAGA       |                                     |                       |
| <i>OPR3</i>     | AT2G06050     | 12-Oxophytodienoate reductase 3                         | CATGCAGTGTATCAACCTAATG<br>CCAGCTCGAATCGCATTCAAAG       |                                     |                       |
| <i>JAZ10</i>    | AT5G13220     | Jasmonate-zim-domain protein 10                         | CGAGTCGTCGATGGAGACAG<br>CTCGAGAAAACGTTGCAGTG           |                                     |                       |



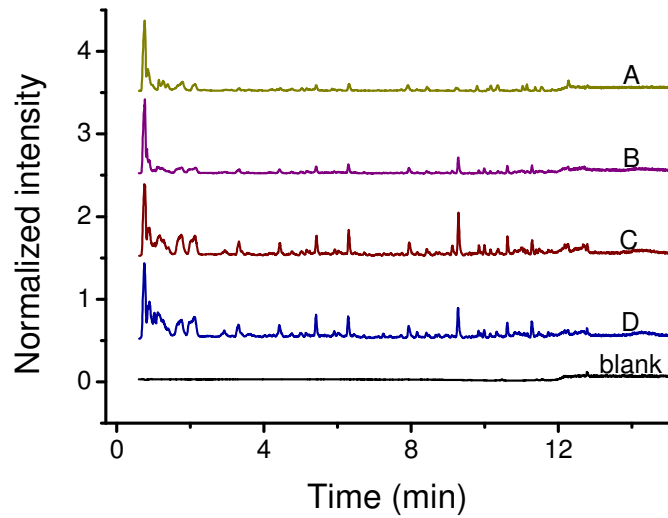

**Fig. S1** UPLC-MS total ion chromatograms (TIC) of *Arabidopsis* leaves extracted by different methods

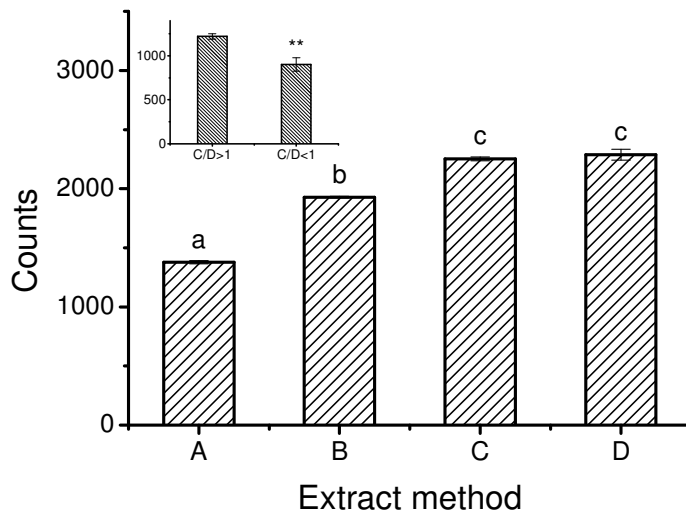

**Fig. S2** Number of detected peaks (intensity threshold,  $5 \times 10^6$ ) from different extract methods. Intensity comparison of detected peaks between method C and D (insert). Data represent mean  $\pm$  SD from three replicates. Superscript letter and asterisk indicates the result of ANOVA test ( $p < 0.01$ )

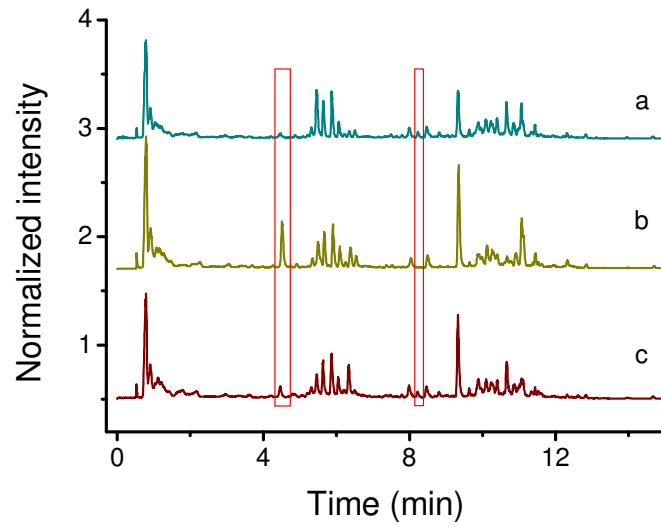

**Fig. S3** TIC of *Arabidopsis* leaves extracts with different genotypes and treatments. **a** Wild type, **b** *opr3*, **c** *opr3* treated with MeJA for 8 h

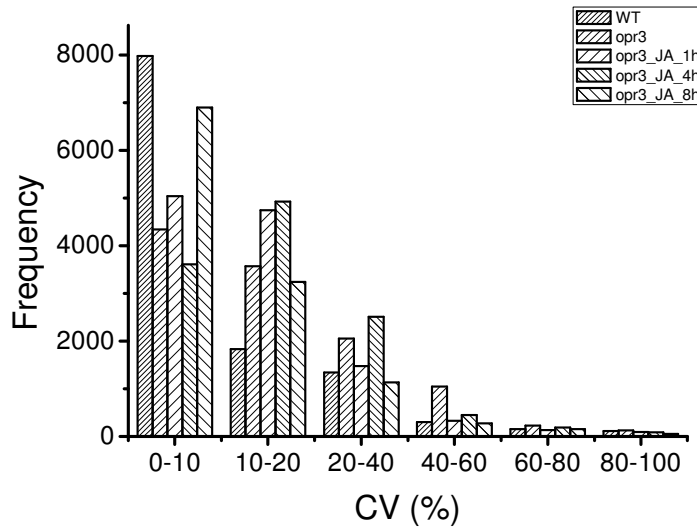

**Fig. S4** Distribution of coefficient of variations of the 12016 signals

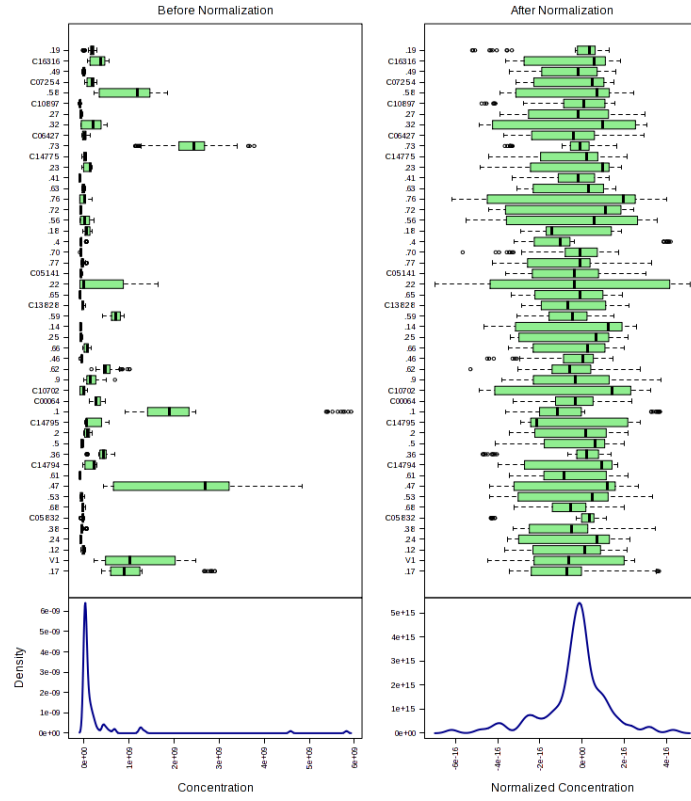

**Fig. S5** Data normalization by sum, log transformation and Pareto scaling

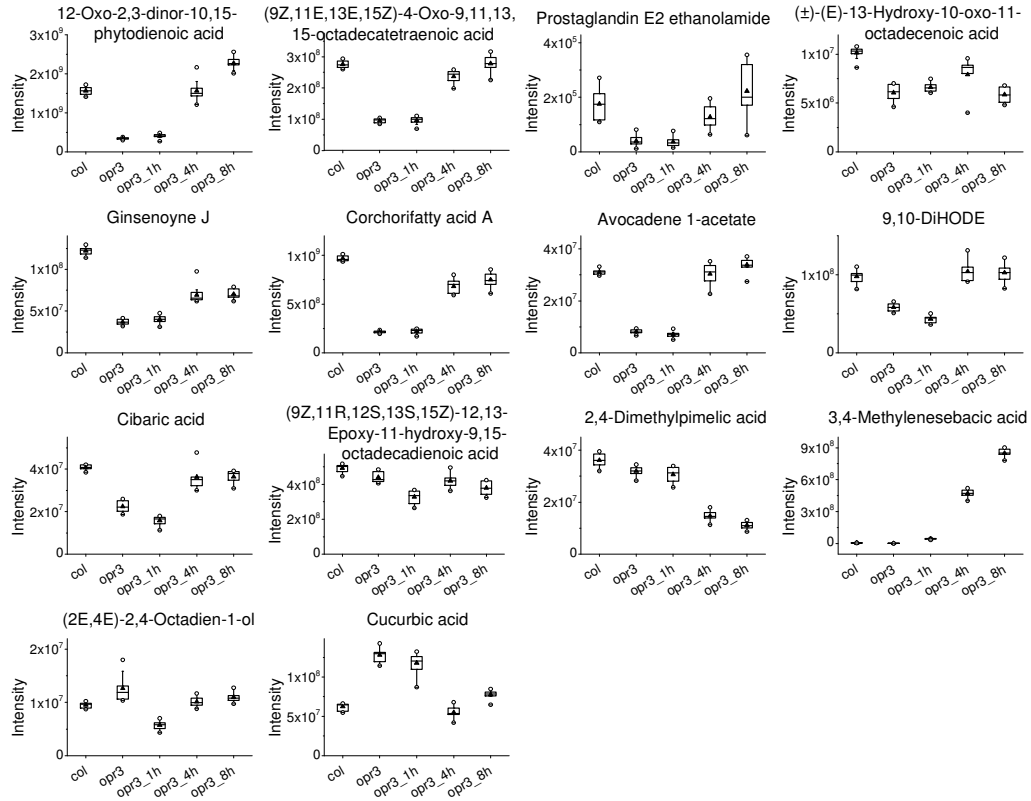

**Fig. S6** Other fatty acyls impacted by *OPR3* deficiency and MeJA treatment

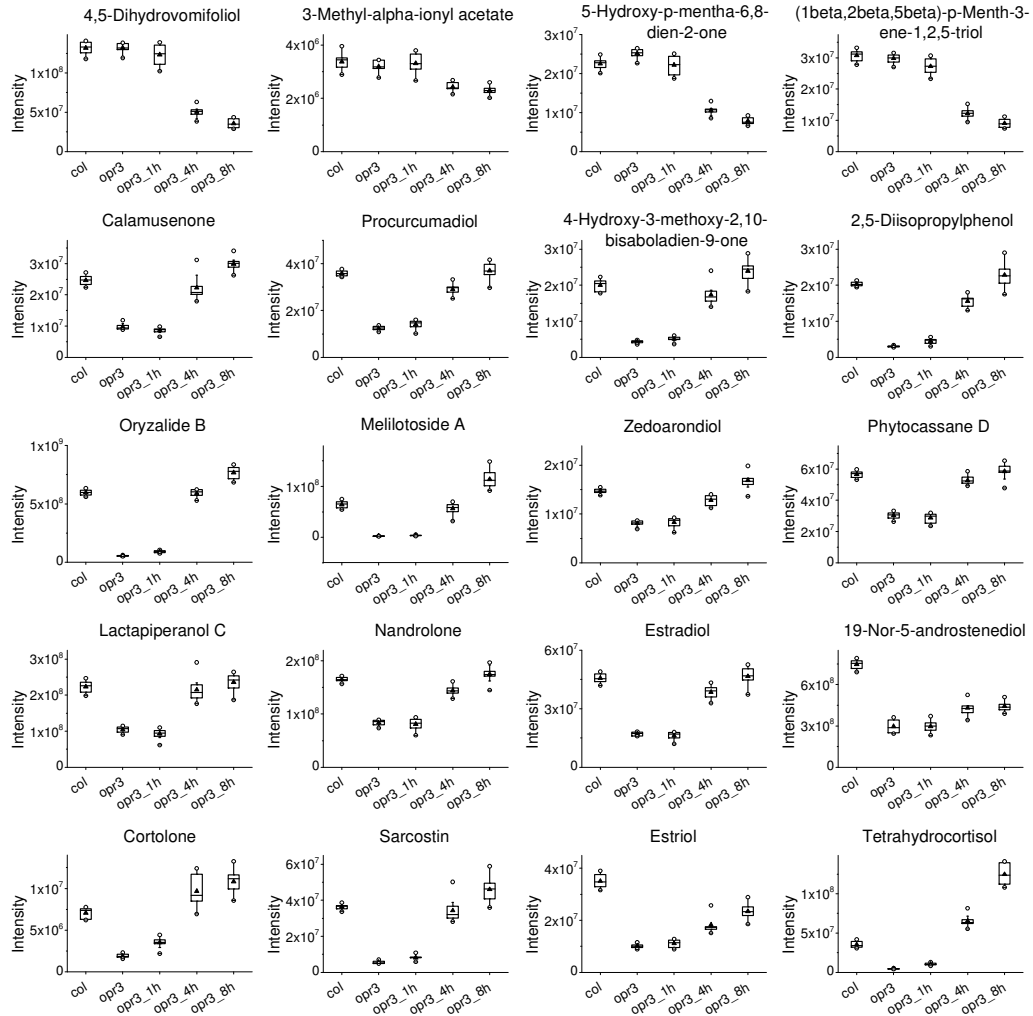

**Fig. S7** Prenol lipids and sterol lipids were impacted by *OPR3* deficiency and MeJA treatment

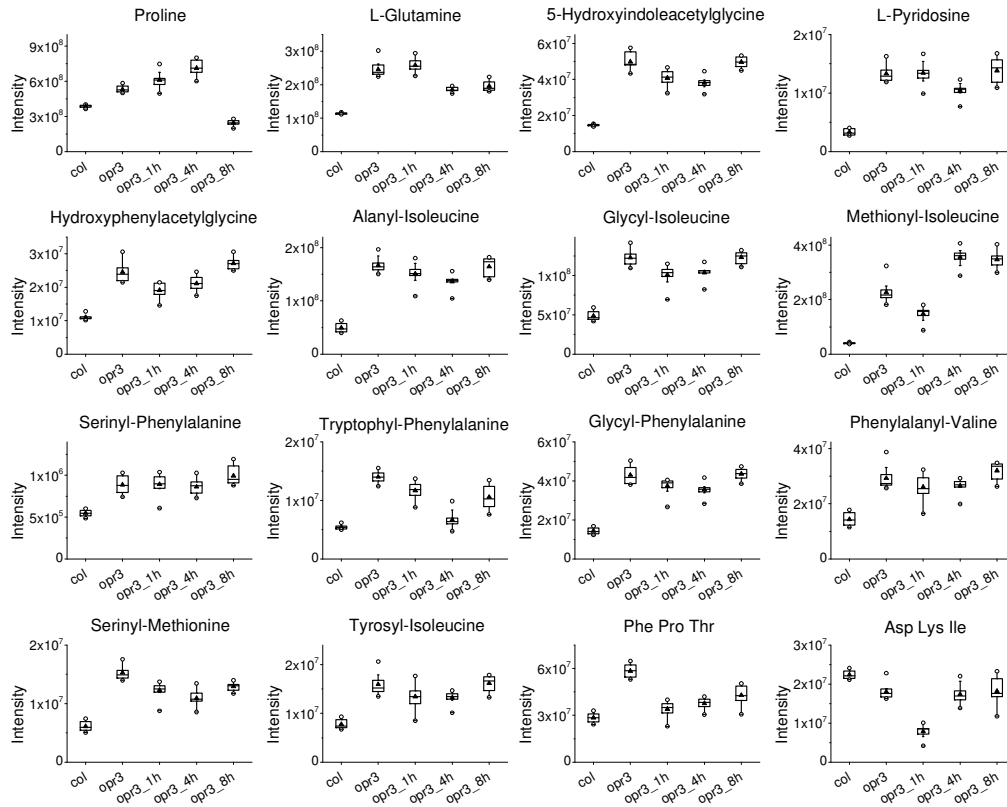

**Fig. S8** Amino acid and derivatives, dipeptides and tripeptides were influenced by *OPR3* deficiency and MeJA treatment

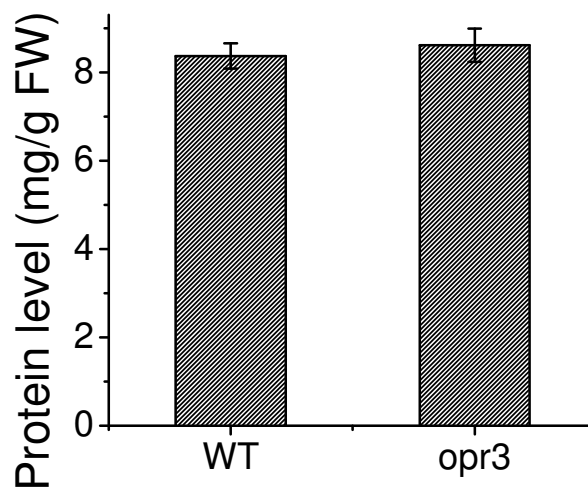

**Fig. S9** Protein contents of wild type and *opr3* mutant by Bradford assay
